# Supplementary material for: Improved anticancer drug response prediction in cell lines using matrix factorization with similarity regularization
Source: Springer Nature journal article supplement (doi:10.1186/s12885-017-3500-5), 2017-08-02
Supplement: MOESM1 [file 13345366]

## The SRMF algorithm

Here let  $u_i$  and  $v_j$  be the  $i$ -th and  $j$ -th row vectors of  $U$  and  $V$ , respectively. We take the

partial derivative of objective function  $L$ , i.e.  $\frac{\partial L}{\partial u_i}$  and obtain the updating rule of  $U$  by setting

$\frac{\partial L}{\partial u_i} = 0$ , as follows:

$$\begin{aligned} & \frac{\partial L}{\partial u_i} \left\{ \sum_{j=1}^n W_{ij} \times (Y_{ij} - u_i v_j^T)^2 + \lambda_l \sum_{j=1}^n u_{ij}^2 + \lambda_d \sum_{p=1}^m \sum_{q=1}^m [S_d(p, q) - u_p u_q^T]^2 \right\} \\ &= 2 \sum_{j=1}^n W_{ij}^2 \times (Y_{ij} - u_i v_j^T) \times (-v_j) + 2\lambda_l u_i + 4\lambda_d \sum_{p=1}^m [S_d(p, i) - u_p u_i^T] \times (-u_p) \\ &= 2 \sum_{j=1}^n W_{ij}^2 \times (Y_{ij} - u_i v_j^T) \times (-v_j) + 2\lambda_l u_i + 4\lambda_d \sum_{p=1}^m [S_d(p, i) - u_i u_p^T] \times (-u_p) \\ &= 0 \end{aligned}$$

As  $W_{ij} = 0$  or  $1$ , so

$$u_i = \left[ \sum_{j=1}^n W_{ij} Y_{ij} v_j + 2\lambda_d \sum_{p=1}^m S_d(p, i) u_p \right] \left( \sum_{j=1}^n W_{ij} v_j^T v_j + \lambda_l I_K + 2\lambda_d \sum_{p=1}^m u_p^T u_p \right)^{-1} \quad (1)$$

Similarly, according to  $\frac{\partial L}{\partial v_j} = 0$ , we obtain the updating rule of  $V$  as follows:

$$v_j = \left[ \sum_{i=1}^m W_{ij} Y_{ij} u_i + 2\lambda_c \sum_{h=1}^n S_c(h, j) v_h \right] \left( \sum_{i=1}^m W_{ij} u_i^T u_i + \lambda_l I_K + 2\lambda_c \sum_{h=1}^n v_h^T v_h \right)^{-1} \quad (2)$$
