# Supplementary material for: Improved anticancer drug response prediction in cell lines using matrix factorization with similarity regularization
Source: Springer Nature journal article supplement (doi:10.1186/s12885-017-3500-5), 2017-08-02

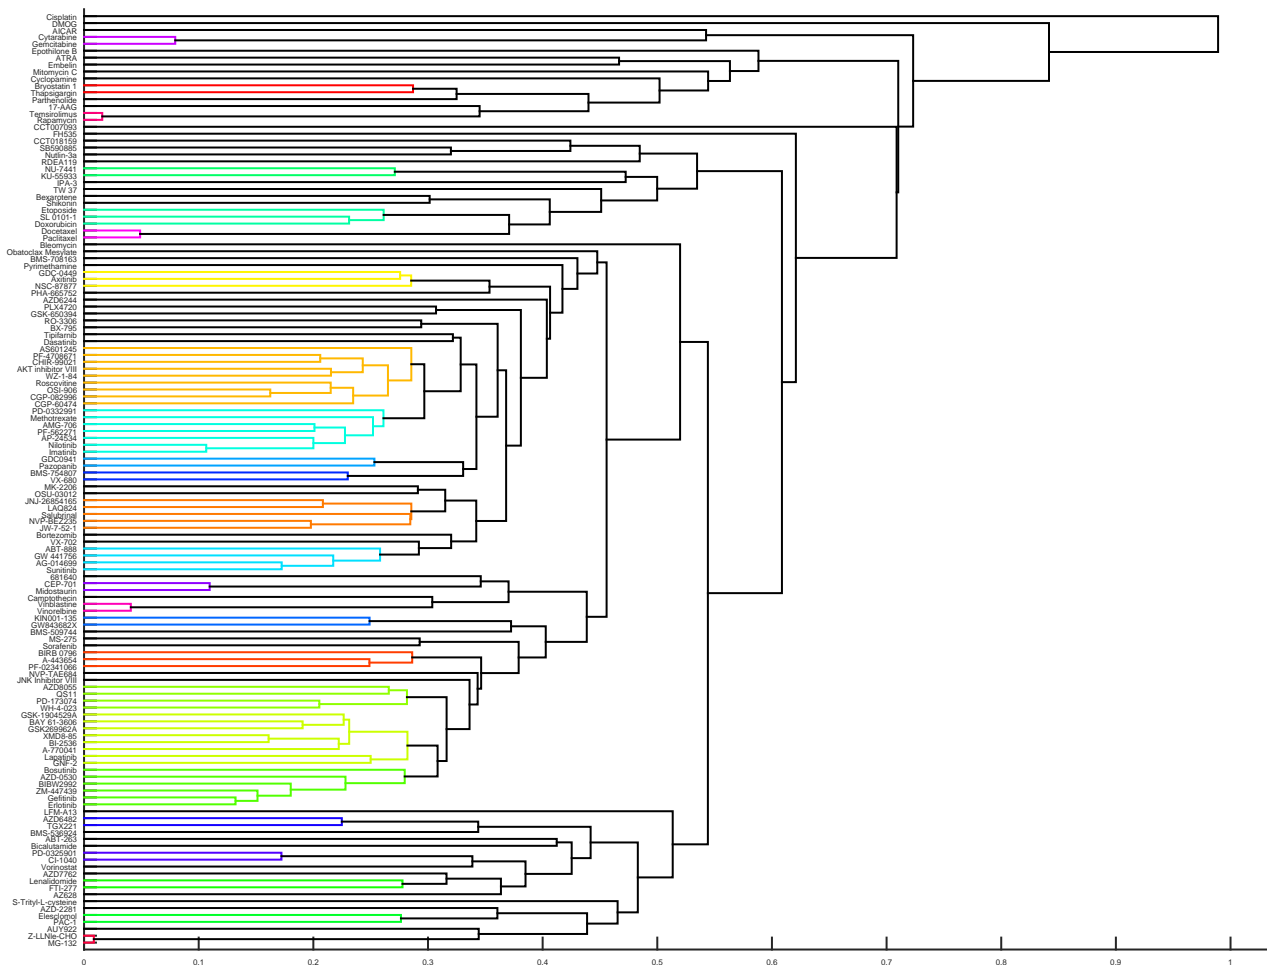

Supplement: MOESM2 [file 13345366]
