# Supplementary material for: Improved anticancer drug response prediction in cell lines using matrix factorization with similarity regularization
Source: Springer Nature journal article supplement (doi:10.1186/s12885-017-3500-5), 2017-08-02
Supplement: MOESM3 [file 13345366]

## Simulated data

All drug response matrices we used have 100 drugs and 150 cell lines. We first embedded five true clusters in the response matrix  $R_{true}$  as follows:  $R_{true} = UV^T$ , where  $U$  and  $V$  are shown in Table S1, and their dimensions are  $100 \times 5$  and  $150 \times 5$ , respectively. The  $(x, y)$ -element of  $R_{true}$  represents activity of drug  $x$  to cell line  $y$  such as activity area, and is 0 if drug  $x$  is the most resistant to cell line  $y$ ; otherwise a higher value indicates a better sensitivity of cell line  $y$  to drug  $x$ . Then Gaussian noise  $E$  was added to  $R_{true}$  with  $R_{noisy} = R_{true} - (\text{noise\_level}) * E$ , where  $\text{noise\_level}$  is a value being changed from 0 to 0.5 by the interval of 0.05. Furthermore, we masked 50% of the values of the cluster and 12.5% of the rest of values for  $R_{noisy}$ , and the resulting matrix was used as input for the drug responses.

As to drug (cell line) similarity, we first generated a true similarity matrix  $Strue$  so that the  $(i, j)$ -element of  $Strue$  is 1 if  $d_i$  and  $d_j$  (or  $c_i$  and  $c_j$ ) belong to the same true cluster; otherwise this value is 0. We then generated a random matrix  $S_{random}$ , where each element of this matrix randomly takes a value between 0 and 1. We finally generated similarity matrices (for both drugs and cell lines) by  $S_{noisy} = Strue - (\text{noise\_level}) * S_{random}$ , where  $\text{noise\_level}$  is a value being changed from 0 to 0.5 by the interval of 0.05, and the diagonal elements of  $S_{noisy}$  are forced to be 1. Figure 1S shows a simulated example with noise level = 0.2 to illustrate the efficiency of SRMF.

| $U$       |            |            |            |            |            | $V$       |            |            |            |            |            |
|-----------|------------|------------|------------|------------|------------|-----------|------------|------------|------------|------------|------------|
| Row\Col   | 1st        | 2nd        | 3rd        | 4th        | 5th        | Row\Col   | 1st        | 2nd        | 3rd        | 4th        | 5th        |
| $u_1$     | rand(20,1) | 0          | 0          | 0          | 0          | $v_1$     | rand(50,1) | 0          | 0          | 0          | 0          |
| $\vdots$  |            |            |            |            |            | $\vdots$  |            |            |            |            |            |
| $u_{20}$  |            |            |            |            |            | $v_{50}$  |            |            |            |            |            |
| $u_{21}$  | 0          | rand(20,1) | 0          | 0          | 0          | $v_{51}$  | 0          | rand(40,1) | 0          | 0          | 0          |
| $\vdots$  |            |            |            |            |            | $\vdots$  |            |            |            |            |            |
| $u_{40}$  |            |            |            |            |            | $v_{90}$  |            |            |            |            |            |
| $u_{41}$  | 0          | 0          | rand(20,1) | 0          | 0          | $v_{91}$  | 0          | 0          | rand(30,1) | 0          | 0          |
| $\vdots$  |            |            |            |            |            | $\vdots$  |            |            |            |            |            |
| $u_{60}$  |            |            |            |            |            | $v_{120}$ |            |            |            |            |            |
| $u_{61}$  | 0          | 0          | 0          | rand(20,1) | 0          | $v_{121}$ | 0          | 0          | 0          | rand(20,1) | 0          |
| $\vdots$  |            |            |            |            |            | $\vdots$  |            |            |            |            |            |
| $u_{80}$  |            |            |            |            |            | $v_{140}$ |            |            |            |            |            |
| $u_{81}$  | 0          | 0          | 0          | 0          | rand(20,1) | $v_{141}$ | 0          | 0          | 0          | 0          | rand(10,1) |
| $\vdots$  |            |            |            |            |            | $\vdots$  |            |            |            |            |            |
| $u_{100}$ |            |            |            |            |            | $v_{150}$ |            |            |            |            |            |

Table S1. Detailed  $U$  and  $V$  used to construct target drug response matrix  $Strue$ . The function  $\text{rand}(x, y)$  creates an  $x \times y$  dimensional matrix with random elements in the range of (0, 1).

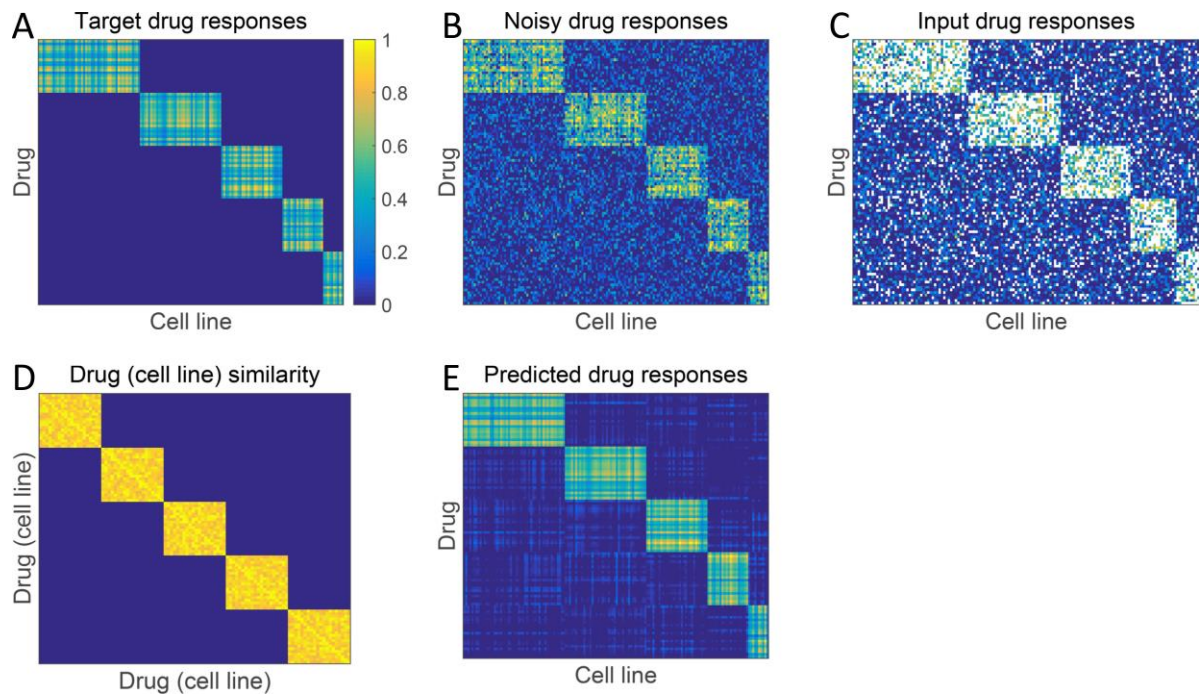

Figure S1. A simulated example illustrating the efficiency of SRMF. A) The target drug response matrix. B) The Gaussian noise with noise level = 0.2 is added to the target response matrix. C) For each drug cluster, 50% of values in the bicluster and 12.5% of the remaining cell lines were masked as missing data. D) The drug (cell line) similarity matrix. E) The predicted drug response matrix.
